# Supplementary material for: Postsynthesis of mesoporous ZSM-5 zeolite by piperidine-assisted desilication and its superior catalytic properties in hydrocarbon cracking
Source: Royal Society of Chemistry journal article supplement (doi:10.1039/c4ta06438k), 2014-12-16
Supplement: c4ta06438k1.pdf [file c4ta06438k1.pdf]

Postsynthesis of mesoporous ZSM-5 zeolite by piperidine-assisted desilication and its superior catalytic properties in hydrocarbon cracking

Darui Wang, Lin Zhang, Li Chen, Haihong Wu, Peng Wu\*

*Shanghai Key Laboratory of Green Chemistry and Chemical Processes, Department of Chemistry, East China Normal University, North Zhongshan Rd. 3663, Shanghai 200062, P. R. China*

*E-mail: pwu@chem.ecnu.edu.cn*

*Tel/Fax: 86-21-62232292*

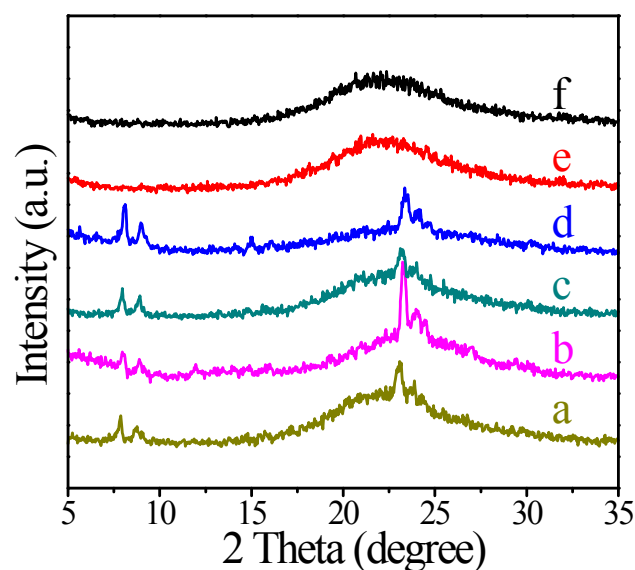

Fig. S1. XRD patterns of the samples synthesized at Si/Al molar ratio of 40 in the presence of (a) piperidine and calcined seeding gel, (b) piperidine and dried seeding gel, (c) only active seeding gel, (d) only piperidine, (e) only calcined seeding gel, (f) only dried seeding gel.

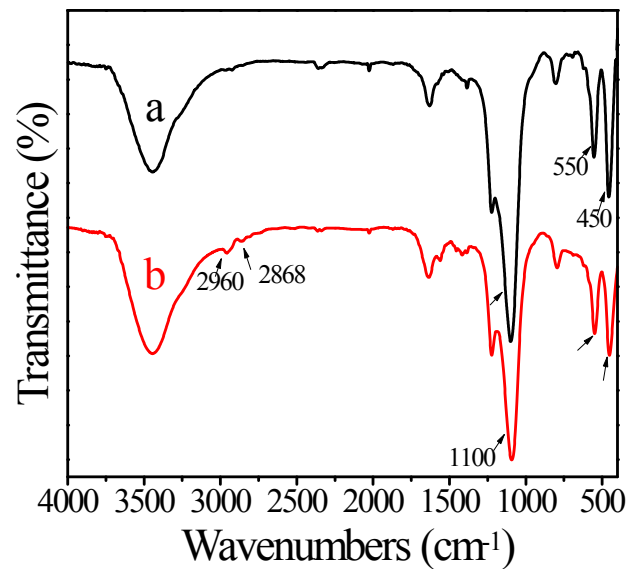

Fig. S2. FT-IR spectra of (a) calcined parent ZSM-5 (Si/Al=40) and (b) alkali-treated sample (AT 0.2 - PI 0.05) without calcination.

Table S1 Acidity determined by NH<sub>3</sub>-TPD measurement of different samples

| No. | Samples          | Q (mmol g <sup>-1</sup> ) |        |       |
|-----|------------------|---------------------------|--------|-------|
|     |                  | Weak                      | Strong | Total |
| 1   | ZSM-5 (parent)   | 0.19                      | 0.28   | 0.47  |
| 2   | AT 0.2 - PI 0.02 | 0.24                      | 0.25   | 0.49  |
| 3   | AT 0.2 - PI 0.01 | 0.31                      | 0.19   | 0.50  |
| 4   | AT 0.2           | 0.37                      | 0.15   | 0.52  |

Table S2 Effect of the parent and alkali-treated H-ZSM-5 on product selectivity

| Catalyst                     | Parent | AT 0.2 | AT 0.2 - PI 0.02 |
|------------------------------|--------|--------|------------------|
| Product Selectivity(C-%)     |        |        |                  |
| Methane                      | 6.80   | 8.93   | 8.95             |
| Ethane                       | 9.32   | 7.47   | 7.59             |
| Ethylene                     | 20.63  | 26.41  | 26.98            |
| Propane                      | 9.35   | 4.47   | 5.06             |
| Propylene                    | 30.06  | 31.20  | 31.19            |
| Butanes                      | 3.00   | 1.65   | 1.71             |
| Butenes                      | 14.28  | 13.76  | 12.79            |
| C5                           | 4.22   | 3.77   | 3.18             |
| C6 <sub>0</sub> <sup>+</sup> | 2.06   | 2.33   | 2.58             |
| Coke (wt.%)                  | 13.05  | 7.29   | 9.64             |
| HTI <sup>a</sup>             | 0.28   | 0.14   | 0.15             |

<sup>a</sup> HTI (hydrogen transfer index) ratio of propane and butanes selectivity to propylene and butenes selectivity
